# Supplementary material for: Novel and Accessible Physical Recycling for Expanded Polystyrene Waste with the Use of Acetone as a Solvent and Additive Manufacturing (Direct Ink-Write 3D Printing)
Source: MDPI journal article supplement (doi:10.3390/polym15193888), 2023-09-26
Supplement: s1 [file s1]

## Supplementary Information

### Novel and Accessible Physical Recycling for Expanded Polystyrene Waste with the Use of Acetone as a Solvent and Additive Manufacturing (Direct Ink-Write 3D Printing)

Rubén García-Sobrino <sup>1,†</sup>, Alejandro Cortés <sup>1,\*,†</sup>, Rocío Calderón-Villajos <sup>1</sup>, Jorge G. Díaz <sup>2</sup> and Marta Muñoz <sup>1,\*</sup>

<sup>1</sup> Department of Applied Mathematics, Materials Science and Engineering and Electronic Technology, Universidad Rey Juan Carlos, Calle Tulipán s/n, 28933 Móstoles, Spain; ruben.sobrino@urjc.es (R.G.-S.)

<sup>2</sup> School of Mechanical Engineering, Industrial University of Santander, Bucaramanga 680002, Colombia; jgdiazro@correo.uis.edu.co

\* Correspondence: alejandro.cortes@urjc.es (A.C.); marta.munoz@urjc.es (M.M.)

† These authors contributed equally to this work.

**KEYWORDS:** Circular economy; Plastic waste recycling; Expanded polystyrene; Additive Manufacturing; Direct Ink Write

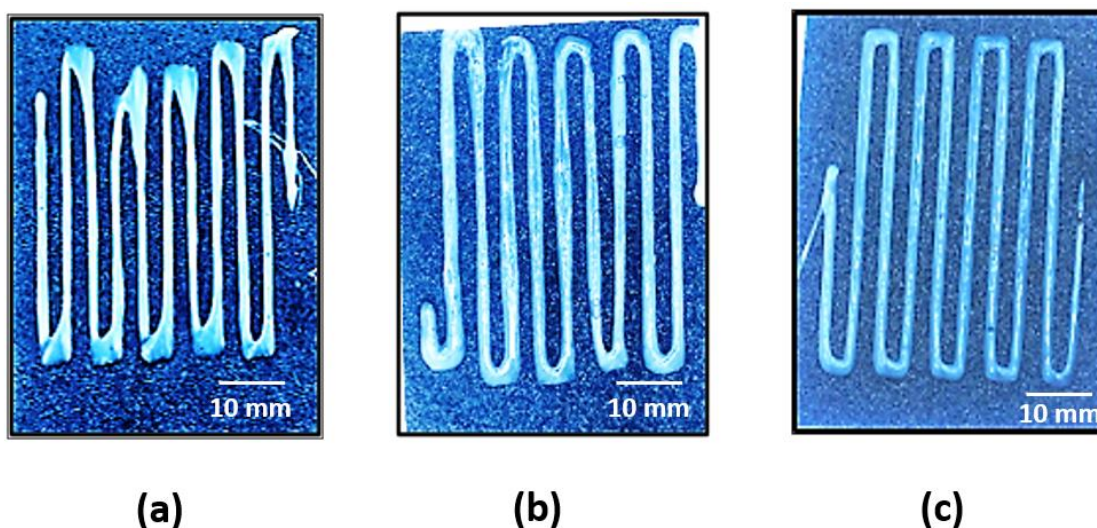

**Supplementary Figure S1.** Specimens printed at 2 mm/s. **a)** using a needle diameter of 14 G, without using silicone oil for reducing the friction forces within the needle when printing. **b)**

without using any needle and printing directly from the syringe. **c)** using a needle diameter of 14 G with silicone oil.

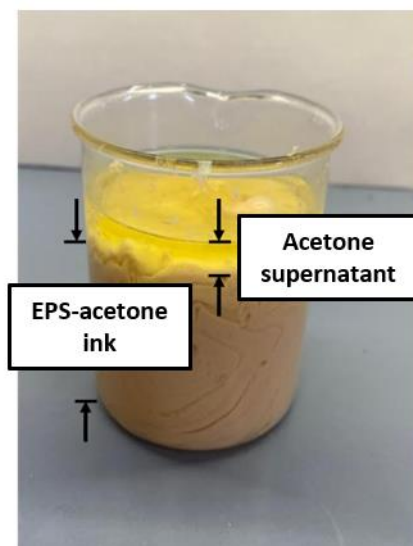

**Supplementary Figure S2.** EPS-acetone mixture (EPS-ink), where the excess of acetone observed as supernatant.
